# Supplementary material for: Reduced length of uninterrupted institutional stay after implementing a fast-track protocol for primary total hip replacement: Register-based analysis of 4 hospitals and 3,193 replacements
Source: PubMed Central journal article supplement — Acta Orthop. 2017 Sep 7;89(1):10–6. doi: 10.1080/17453674.2017.1370845 (PMC5810815; doi:10.1080/17453674.2017.1370845), 2017-09-07
Supplement: IORT_A_1370845_SM4181.pdf [file IORT_A_1370845_SM4181.pdf]

## Supplementary data

Table 4. Reasons for readmissions within 42 days in Hospital A before and after fast-track implementation given as numbers of readmissions and percentage of THRs during the 2 2-year study periods

| ICD-10 |                                                                                               | 2009–2010 |     | 2012–2013 |     |
|--------|-----------------------------------------------------------------------------------------------|-----------|-----|-----------|-----|
|        |                                                                                               | n         | %   | n         | %   |
| A415   | Sepsis due to other gram-negative organisms                                                   |           |     | 2         | 0.5 |
| E871   | Hypo-osmolality and hyponatremia                                                              |           |     | 1         | 0.2 |
| F3210  | Major depressive disorder, single episode                                                     | 1         | 0.2 |           |     |
| I48    | Atrial fibrillation and flutter                                                               | 1         | 0.2 |           |     |
| I20.1  | Angina pectoris with documented spasm                                                         |           |     | 1         | 0.2 |
| I50.0  | Heart failure                                                                                 | 1         | 0.2 |           |     |
| I50.9  | Heart failure, unspecified                                                                    | 1         | 0.2 | 1         | 0.2 |
| J18.9  | Pneumonia, unspecified organism                                                               | 2         | 0.4 |           |     |
| K55.0  | Acute vascular disorders of intestine                                                         |           |     | 1         | 0.2 |
| K92.2  | Gastrointestinal hemorrhage, unspecified                                                      |           |     | 1         | 0.2 |
| M16.0  | Bilateral primary osteoarthritis of hip                                                       | 1         | 0.2 |           |     |
| M16.1  | Unilateral primary osteoarthritis of hip                                                      | 1         | 0.2 | 2         | 0.5 |
| M96.6  | Fracture of bone following insertion of orthopedic implant, joint prosthesis, or bone plate   | 1         | 0.2 |           |     |
| N10    | Acute pyelonephritis                                                                          | 1         | 0.2 | 1         | 0.2 |
| N81.6  | Rectocele                                                                                     |           |     | 1         | 0.2 |
| R06.0  | Dyspnea                                                                                       |           |     | 1         | 0.2 |
| R07.4  | Chest pain, unspecified                                                                       |           |     | 1         | 0.2 |
| R10.4  | Unspecified abdominal pain                                                                    |           |     | 1         | 0.2 |
| R60.0  | Localized edema                                                                               | 1         | 0.2 |           |     |
| S72.1  | Pertrochanteric fracture                                                                      | 1         | 0.2 |           |     |
| S72.3  | Fracture of shaft of femur                                                                    | 1         | 0.2 |           |     |
| S72.4  | Fracture of lower end of femur                                                                |           |     | 1         | 0.2 |
| T81.0  | Unspecified open wound, knee                                                                  |           |     | 2         | 0.5 |
| T81.3  | Disruption of wound, unspecified                                                              |           |     | 1         | 0.2 |
| T81.4  | Infection following a procedure                                                               | 1         | 0.2 | 6         | 1.4 |
| T84.0  | Mechanical complication of internal joint prosthesis                                          |           |     | 9         | 2.1 |
| T84.5  | Infection and inflammatory reaction due to unspecified internal joint prosthesis              |           |     | 3         | 0.7 |
| T84.8  | Other specified complications of internal orthopedic prosthetic devices, implants, and grafts |           |     | 1         | 0.2 |
| Z01.8  | Encounter for other specified special examinations                                            | 1         | 0.2 |           |     |

### Appendix 1. Exclusion criteria (ICD-10 diagnosis)

|       |                                                                                  |
|-------|----------------------------------------------------------------------------------|
| S72.0 | Fracture of neck of femur                                                        |
| S72.1 | Pertrochanteric fracture of femur                                                |
| S72.2 | Subtrochanteric fracture of femur                                                |
| M19.1 | Juvenile osteochondrosis of head of femur (Legg–Calvé–Perthes)                   |
| M93.0 | Slipped upper femoral epiphysis (nontraumatic)                                   |
| S32.4 | Fracture of acetabulum                                                           |
| M45.* | Ankylosing spondylitis                                                           |
| Q65.* | Luxatio coxae congenitae                                                         |
| M16.4 | Post-traumatic coxarthrosis                                                      |
| M16.5 | Other post-traumatic coxarthrosis                                                |
| M16.6 | Other secondary coxarthrosis, bilateral                                          |
| M16.7 | Other secondary coxarthrosis                                                     |
| M16.9 | Coxarthrosis, unspecified                                                        |
| M87.* | Osteonecrosis                                                                    |
| M00.* | Pyogenic arthritis                                                               |
| M05.* | Seropositive rheumatoid arthritis                                                |
| M06.* | Other rheumatoid arthritis                                                       |
| M07.* | Psoriatic and enteropathic arthropathies                                         |
| M08.* | Juvenile arthritis                                                               |
| D66   | Hereditary factor VIII deficiency                                                |
| D67   | Hereditary factor IX deficiency                                                  |
| D68   | Other coagulation defects                                                        |
| M36.2 | Hemophilic arthropathy                                                           |
| Q77   | Osteochondrodysplastic with defects of growth of tubular bones and spine         |
| Q78   | Other osteochondrodysplasias                                                     |
| Q79   | Congenital malformations of the musculoskeletal system, not elsewhere classified |

### Appendix 2. Comorbid diseases used in the adjustment of the study population

|                     |                                                                                                                                                                                                                                        |
|---------------------|----------------------------------------------------------------------------------------------------------------------------------------------------------------------------------------------------------------------------------------|
| Hypertension        | (ICD-10: I10*–I15*, ICD-9: 40*, entitlement to reimbursement from Social Insurance Institution: 205, use and cost of drugs ATC: C03*, C07* (if there is no coronary disease or atrial fibrillation), C09A*, C09B*, C09C*, C09D*, C08*) |
| Coronary disease    | (ICD-10: I20*–I25*, ICD-9: 410*–414*, entitlement to reimbursement from Social Insurance Institution: 206, 213, 280)                                                                                                                   |
| Atrial fibrillation | (ICD-10: I48*, ICD-9: 4273*, entitlement to reimbursement from Social Insurance Institution: 207, use and cost of drugs ATC: B01AA03)                                                                                                  |
| Heart insufficiency | (ICD-10: I50*, ICD-9: 428*, entitlement to reimbursement from Social Insurance Institution: 201)                                                                                                                                       |
| Diabetes            | (ICD-10: E10*–E14*, ICD-9: 250*, entitlement to reimbursement from Social Insurance Institution: 103 use and cost of drugs ATC-DDD: A10A*, A10B*)                                                                                      |
| Cancer              | (ICD-10: C00*–C99*, D00*–D09*, ICD-9: 140*–208*, entitlement to reimbursement from Social Insurance Institution: 115, 116, 117, 128, 130, 180, 184, 185, 189, 311, 312, 316, use and cost of drugs ATC L01* except L01BA01)            |
| COPD and asthma     | (ICD-10: J44*–J46*, ICD-9: 4912*, 496*, 493*, entitlement to reimbursement from Social Insurance Institution: 203, use and cost of drugs ATC: R03*)                                                                                    |
| Depression          | (ICD-10: F32*–F34*, ICD-9: 2960*, 2961*, 2069*, use and cost of drugs ATC: N06A*)                                                                                                                                                      |
| Parkinson's disease | (ICD-10: G20*, ICD-9: 332*, entitlement to reimbursement from Social Insurance Institution: 110, use and cost of drugs ATC: N04B*)                                                                                                     |
| Dementia            | (ICD-10: F00*–F03*, G30*, ICD-9: 290*, 3310*, entitlement to reimbursement from Social Insurance Institution: 307, use and cost of drugs ATC: N06D*)                                                                                   |
| Renal insufficiency | (ICD-10: N18*, ICD-9: 585*, entitlement to reimbursement from Social Insurance Institution: 137)                                                                                                                                       |
| Mental disorders    | (ICD-10: F20*–F31*, ICD-9: 295*–298*, except 2960*, 2961*, entitlement to reimbursement from Social Insurance Institution: N05A* except N05AB04 and N05AB01 and there is no dementia)                                                  |
